# Supplementary material for: Geostatistical exploration of dataset assessing the heavy metal contamination in Ewekoro limestone, Southwestern Nigeria
Source: PubMed Central journal article supplement (PMC5537382; doi:10.1016/j.dib.2017.07.041), 2017-07-21
Supplement: mmc1.pdf [file mmc1.pdf]

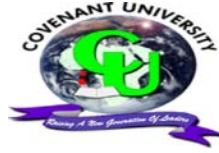

**COVENANT UNIVERSITY**  
**COLLEGE OF SCIENCE AND TECHNOLOGY**  
**DEPARTMENT OF MATHEMATICS**

CANAANLAND, KM 10, IDIROKO ROAD  
P.M.B 1023, OTA, OGUN STATE, NIGERIA

[www.covenantuniversity.edu.ng](http://www.covenantuniversity.edu.ng), [mat.covenantuniversity.edu.ng](http://mat.covenantuniversity.edu.ng)

**EXTERNAL MEMO**

---

**To:** Editor, Data in Brief  
**From:** Corresponding Author  
**Date:** 22<sup>nd</sup> May, 2017  
**Subject:** **Conflict of Interest**

---

I thereby declare the absence of any conflict of interest among the authors.

The authors have read the final draft and unanimously agreed that the paper be sent for review.

**Hilary I. Okagbue**

Department of Mathematics, Covenant University, Ota.

Google Scholar: Hilary Izuchukwu Okagbue

Research Gate: Hilary Okagbue

Live DNA: 234.14453

Scopus ID: 56438006100

ORCID: 0000-0002-3779-9763
